# Supplementary figures and images for: Mucosal mRNA Vaccines. Merits and Perspectives
Source: Preprints.org preprint supplement (doi:10.20944/preprints202402.0614.v1), 2024-02-12

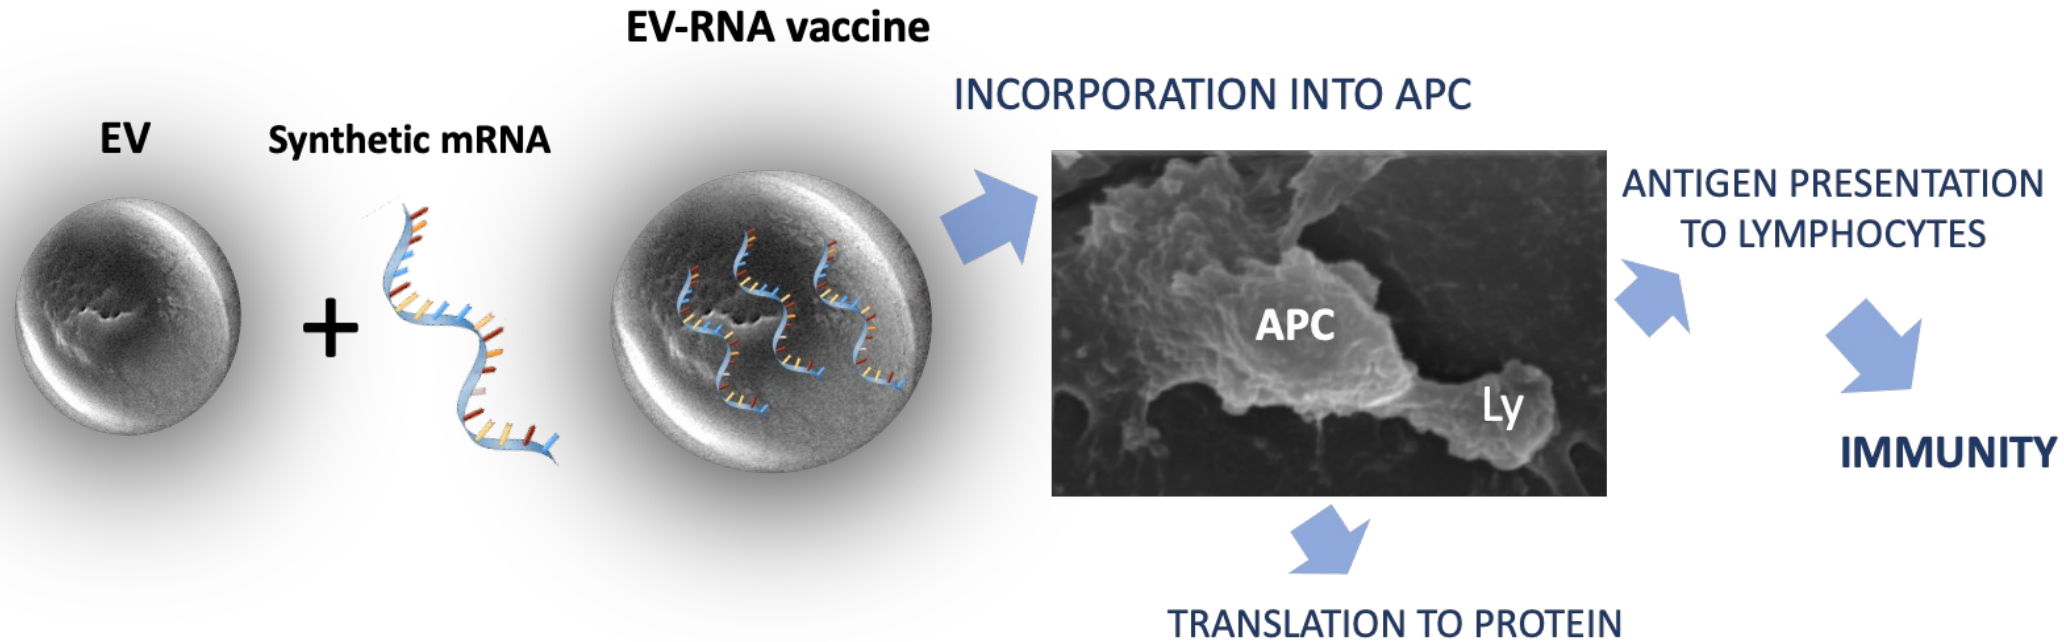

Supplement: Supplementary file 1 [file supplementary]
